# Supplementary material
Source: MDPI journal article supplement (https://www.mdpi.com/2073-4344/13/5/865)
Supplement: s1 [file s1 › catalysts-2365642-supplementary.pdf]

## Supporting Information

**Figure S1/4**

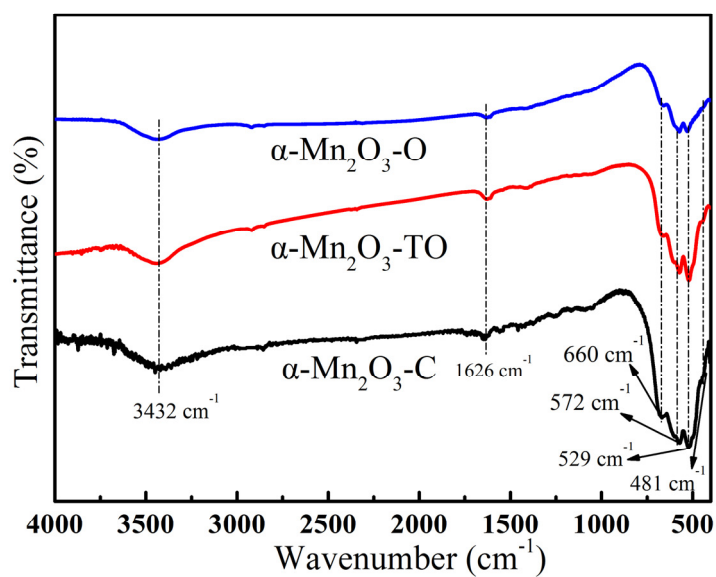

**Figure S1.** FT-IR spectra of  $\alpha\text{-Mn}_2\text{O}_3$  catalysts with different morphologies.

**Figure S2/4**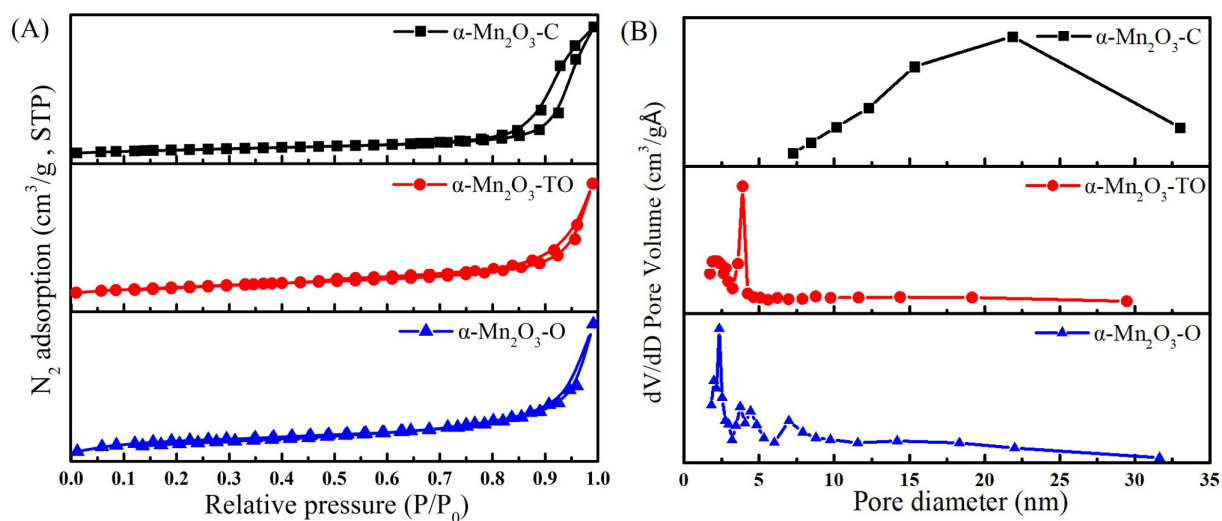

**Figure S2.** N<sub>2</sub> adsorption-desorption isotherms (A), and the pore size distributions (B) of three  $\alpha$ -Mn<sub>2</sub>O<sub>3</sub> catalysts.

Figure S3/4

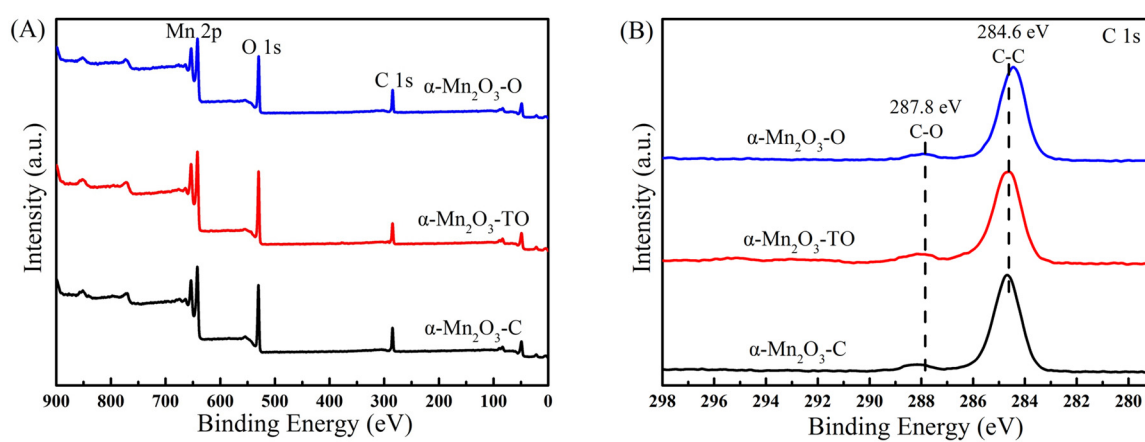

**Figure S3.** XPS patterns of the survey (A) and C 1s (B) of different morphologies  $\alpha\text{-Mn}_2\text{O}_3$  catalysts.

Figure S4/4

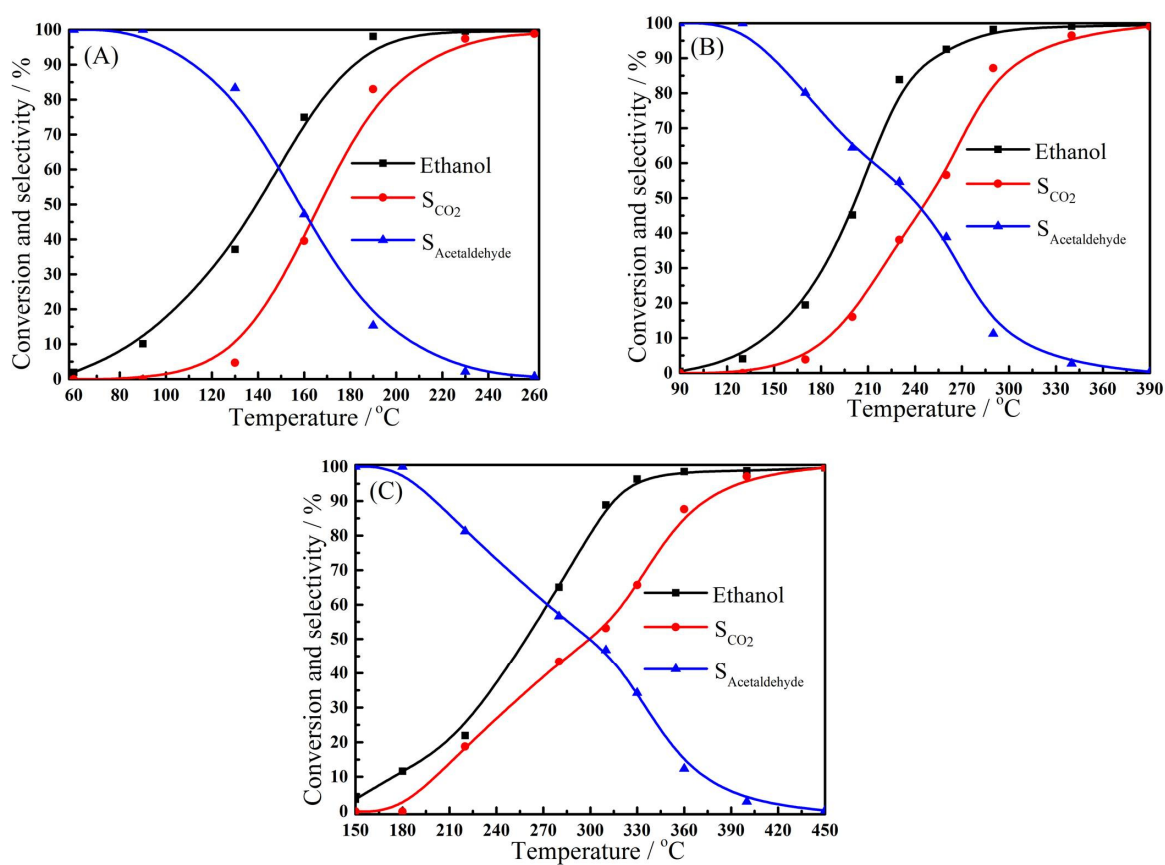

**Figure S4.** Ethanol conversion, acetaldehyde and CO<sub>2</sub> selectivity profiles of ethanol catalytic performance over  $\alpha$ -Mn<sub>2</sub>O<sub>3</sub> catalysts with different morphologies.  $\alpha$ -Mn<sub>2</sub>O<sub>3</sub>-C (A),  $\alpha$ -Mn<sub>2</sub>O<sub>3</sub>-TO (B),  $\alpha$ -Mn<sub>2</sub>O<sub>3</sub>-O (C) under normal conditions.
